# Supplementary material
Source: Springer Nature journal article supplement (https://www.springermedizin.de/resource/supplementary/12883_2014_1152_MOESM2_ESM.pdf/9456616)

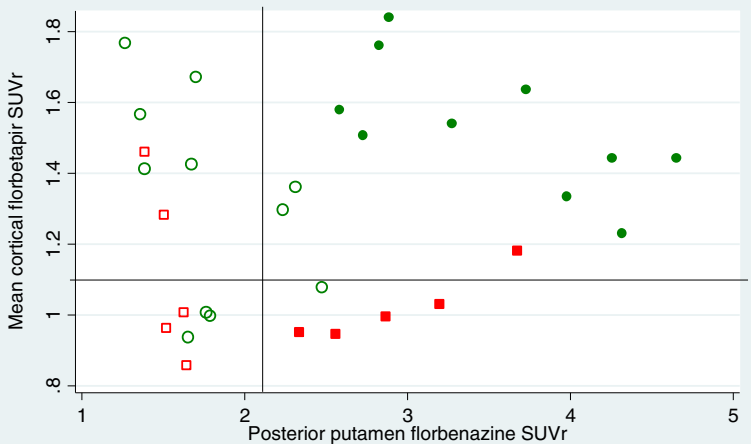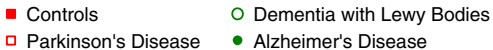

Supplement: MOESM2 [file 9456616]
